# Supplementary material for: IL-22-Activated MUC13 Impacts on Colonic Barrier Function through JAK1/STAT3, SNAI1/ZEB1 and ROCK2/MAPK Signaling
Source: MDPI journal article supplement (doi:10.3390/cells12091224), 2023-04-23
Supplement: s1 [file s1]

## Supplementary Material

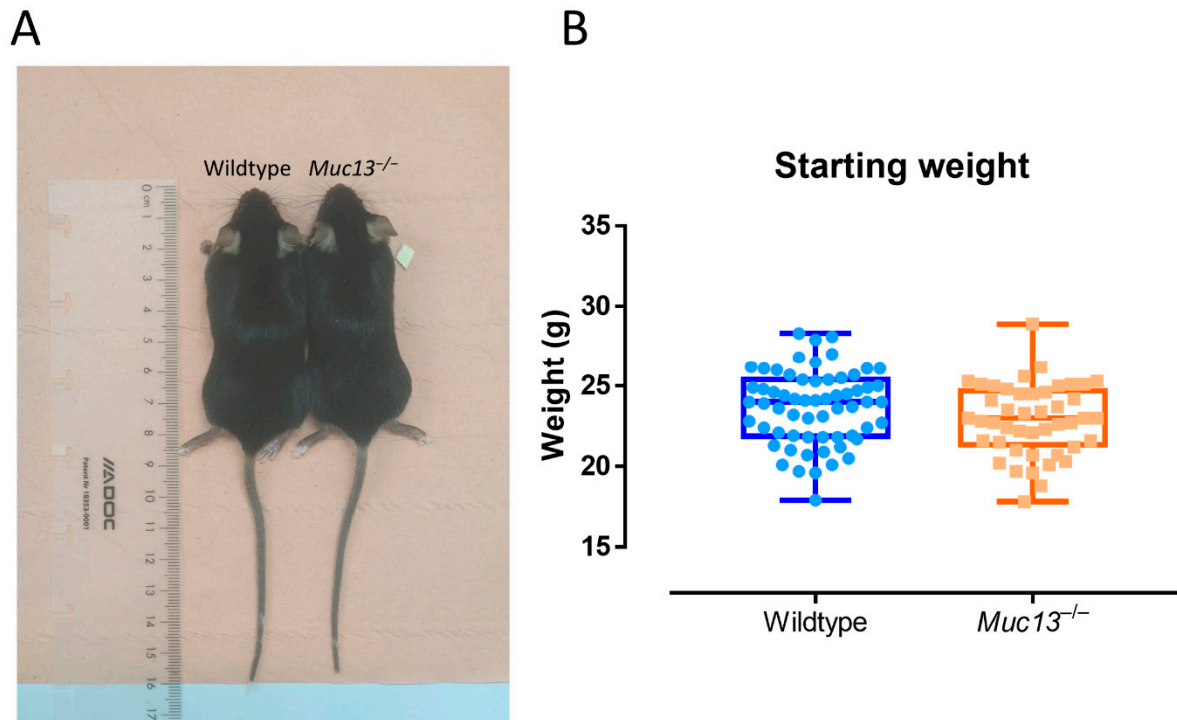

**Figure S1.** Comparison of healthy wildtype and *Muc13*<sup>-/-</sup> mice. **(A)** Representative photo of 7-week old male wildtype and *Muc13*<sup>-/-</sup> mice. **(B)** Weight of wildtype and *Muc13*<sup>-/-</sup> mice at the start of the DSS experiments.

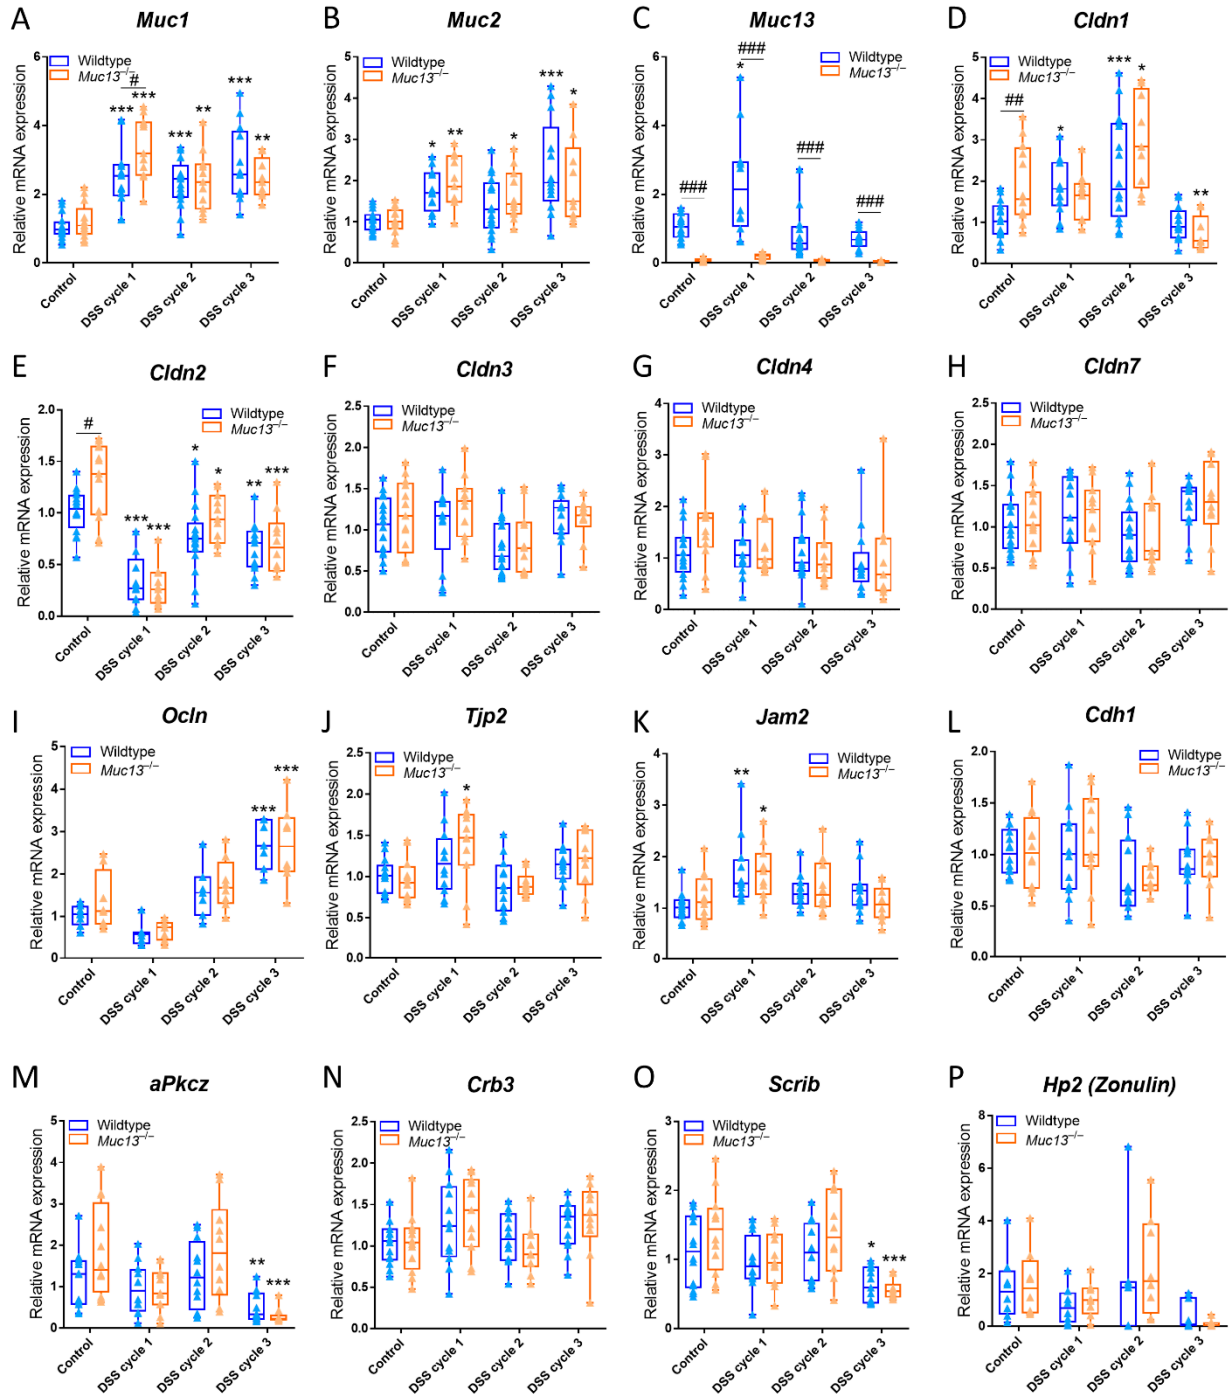

**Figure S2.** Gene expression of mucins, intercellular junctions and cell polarity complexes in the colon of wildtype and *Muc13*<sup>-/-</sup> mice during the course of DSS-colitis. Relative mRNA expression of (A-C) mucins (*Muc1*, *Muc2*, *Muc13*), (D-K) tight junctions (*Cldn1*, *Cldn2*, *Cldn3*, *Cldn4*, *Cldn7*, *Ocln*, *Tjp2*, *Jam2*), (L) adherens junctions (*Cdh1*), and (M-O) cell polarity subunits (*Scrib*, *Crb3*, *aPKcz*) and *Hp2* (Zonulin) in the colon of healthy and DSS-colitis wildtype and *Muc13*<sup>-/-</sup> mice (N=7-17/group/gene). Significant differences between control and colitis mice are indicated by \*p<0.05; \*\*p<0.01; \*\*\*p<0.001 and between wildtype (WT) and *Muc13*<sup>-/-</sup> by #p<0.05; ##p<0.01; ###p<0.001 (Two-Way ANOVA).

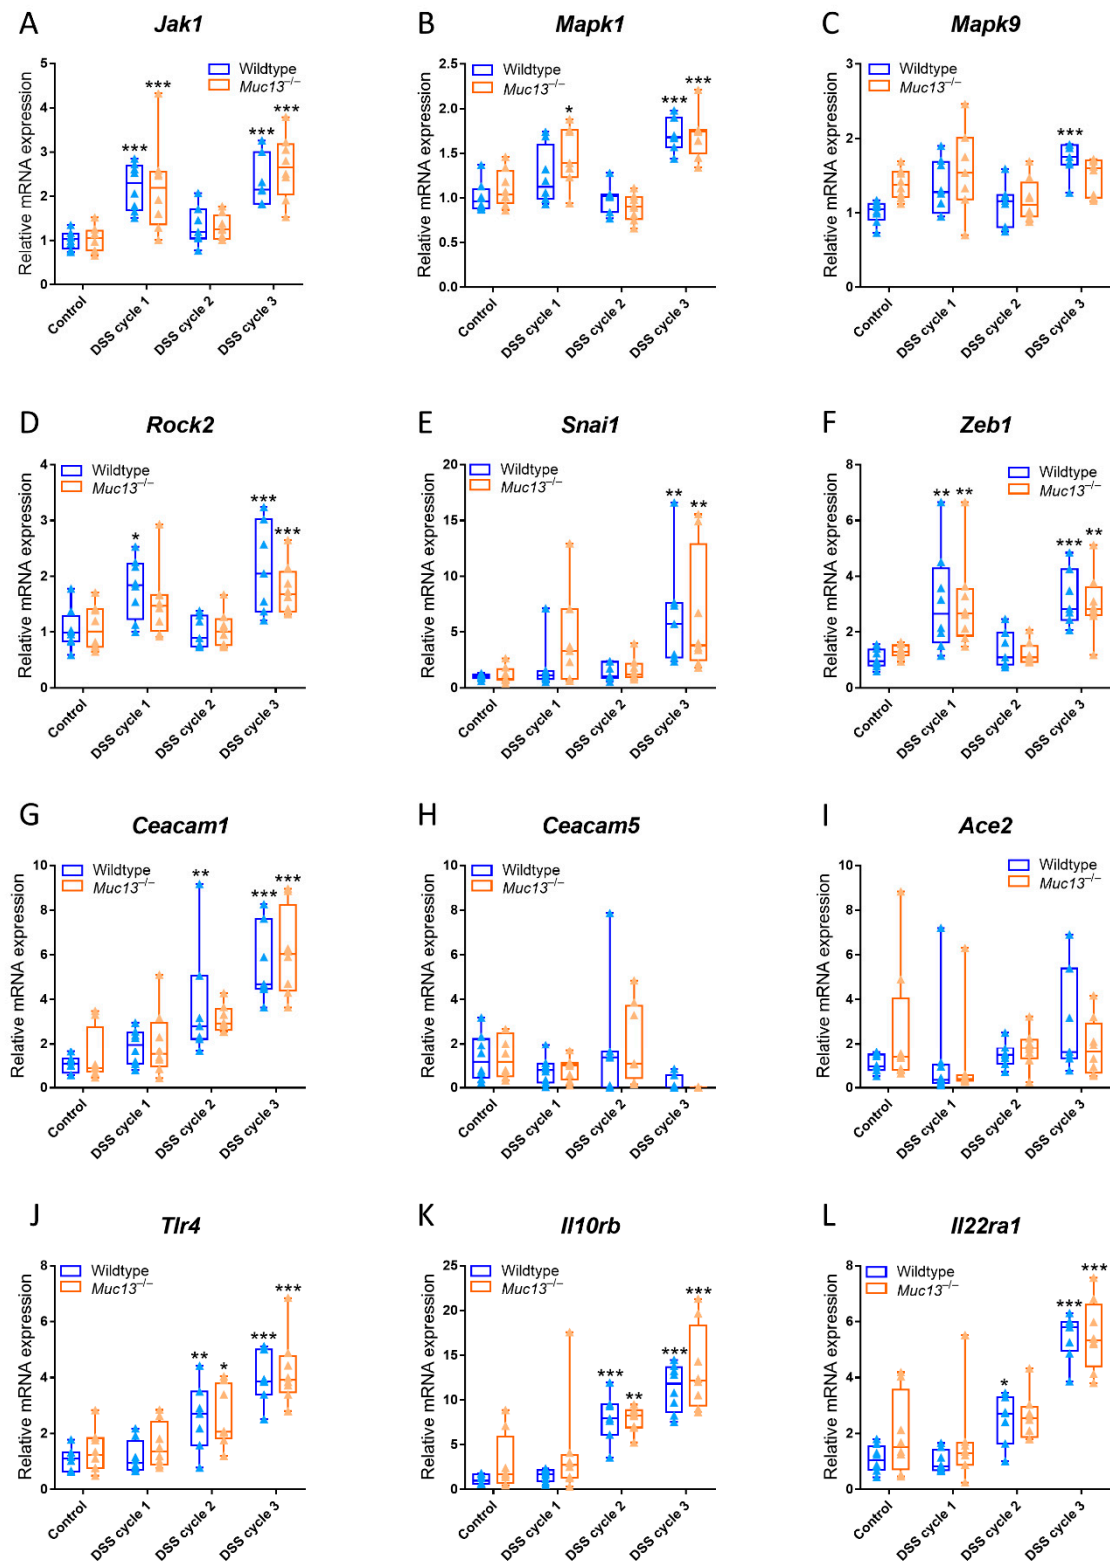

**Figure S3.** mRNA expression analysis of major regulators and epithelial immunity mediators involved in intestinal barrier homeostasis in the colon of wildtype and *Muc13*<sup>-/-</sup> mice during the course of DSS-colitis. Relative mRNA expression of (A–F) major regulators (*Jak1*, *Mapk1*, *Mapk9*, *Rock2*, *Snai1*, *Zeb1*) and (G–L) epithelial immunity mediators (*Ceacam1*, *Ceacam5*, *Ace2*, *Tlr4*, *Il10rb*, *Il22ra1*) (N=7-17/group/gene). Significant differences between control and colitis mice are indicated by \*p<0.05; \*\*p<0.01; \*\*\*p<0.001 (Two-Way ANOVA).

**Table S1.** Primer sequences used in qPCR assays.

| Gene name | Species | Primer                                  | Primer sequence (5'-3')                                      |
|-----------|---------|-----------------------------------------|--------------------------------------------------------------|
| ACE2      | Human   | Hs_ACE2_1_SG QuantiTect Primer Assay    | QT00034055                                                   |
| ACTB      | Human   | Hs_ACTB_1_SG QuantiTect Primer Assay    | QT00095431                                                   |
| CEACAM1   | Human   | Hs_CEACAM1_1_SG QuantiTect Primer Assay | QT00072429                                                   |
| CEACAM5   | Human   | Hs_CEACAM5_1_SG QuantiTect Primer Assay | QT00032991                                                   |
| CEACAM6   | Human   | Hs_CEACAM6_1_SG QuantiTect Primer Assay | QT00066521                                                   |
| CDH1      | Human   | Hs_CDH1_1_SG QuantiTect Primer Assay    | QT00080143                                                   |
| CLDN1     | Human   | Hs_CLDN1_1_SG QuantiTect Primer Assay   | QT00225764                                                   |
| CLDN2     | Human   | FW<br>REV                               | CGGGACTTCTACTCAC-<br>CACTG<br>GGATGATTCCAGC-<br>TATCAGGGA    |
| CLDN3     | Human   | Hs_CLDN3_1_SG QuantiTect Primer Assay   | QT00201376                                                   |
| CLDN4     | Human   | Hs_CLDN4_1_SG QuantiTect Primer Assay   | QT00241073                                                   |
| CLDN7     | Human   | Hs_CLDN7_1_SG QuantiTect Primer Assay   | QT00236061                                                   |
| CRB3      | Human   | FW<br>REV                               | CCTTCATCCAC-<br>CAGCTCCAG<br>GCCAAGAGGGAGAAGAC-<br>CAC       |
| GAPDH     | Human   | Hs_GAPDH_1_SG QuantiTect Primer Assay   | QT00079247                                                   |
| IL10RB    | Human   | FW<br>REV                               | ATGAGCATTGAGACTGGG-<br>TAAAC<br>TTTATAGGGGCTAAGAAAC-<br>GCAT |
| IL22      | Human   | FW<br>REV                               | GCTT-<br>GACAAGTCCAACTTCCA<br>GCTCACTCAT-<br>ACTGACTCCGT     |
| IL22RA1   | Human   | FW<br>REV                               | CCGGCTAACCCTGGAA-<br>GAC<br>TCCAAGGTGCATTTGG-<br>TAGGT       |
| JAK1      | Human   | FW<br>REV                               | CCACTACCG-<br>GATGAGGTTCTA<br>GGGTCTCGAA-<br>TAGGAGCCAG      |
| JAM2      | Human   | Hs_JAM2_1_SG QuantiTect Primer Assay    | QT00078764                                                   |
| MAPK1     | Human   | FW<br>REV                               | TACACCAACCTCTCG-<br>TACATCG<br>CATGTCTGAAGCGCAG-<br>TAAGATT  |
| MAPK9     | Human   | FW<br>REV                               | GAAACTAA-<br>GCCGTCTTTTCAGA<br>TCCAGCTCCATGTGAA-<br>TAACCT   |
| MUC1      | Human   | Hs_MUC1_1_SG QuantiTect Primer Assay    | QT00015379                                                   |
| MUC13     | Human   | Hs_MUC13_1_SG QuantiTect Primer Assay   | QT00002478                                                   |

|         |       |                                      |           |                                                              |
|---------|-------|--------------------------------------|-----------|--------------------------------------------------------------|
| PRKCZ   | Human |                                      | FW<br>REV | ATGACGAGGA-<br>TATTGACTGGGT<br>CAGGAGTGTAATCCGAC-<br>CAGG    |
| ROCK2   | Human |                                      | FW<br>REV | TGGTTTCTATGGGCGA-<br>GAATGT<br>CAAGTCGTAC-<br>CTCCCTATCTGTT  |
| SCRIB   | Human |                                      | FW<br>REV | CCTCTGTCAAGGGAG-<br>TGTCG<br>CCCGAGAGATGAA-<br>TATGCCCTC     |
| SNAI1   | Human |                                      | FW<br>REV | CACTATGCCGCGCTCTTTC<br>GGTCGTAGGGCTGCTG-<br>GAA              |
| TJP2    | Human | Hs_TJP2_1_SG QuantiTect Primer Assay |           | QT00010290                                                   |
| TLR4    | Human | Hs_TLR4_1_SG QuantiTect Primer Assay |           | QT00035238                                                   |
| ZEB1    | Human |                                      | FW<br>REV | TTACACCTTTGCATA-<br>CAGAACCC<br>TTTACGAT-<br>TACACCCAGACTGC  |
| Ace2    | Mouse |                                      | FW<br>REV | TGGTCTTCTGCCATCCGAT<br>T<br>CCATCCACCTCCAC-<br>TTCTCTAA      |
| Cdh1    | Mouse |                                      | FW<br>REV | CAGTTCCGAGGTCTACAC-<br>CTT<br>TGAATCGGGAG-<br>TCTTCCGAAAA    |
| Ceacam1 | Mouse |                                      | FW<br>REV | TCACGGGGCAAGCATA-<br>CAG<br>TCGCCTGAGTACGACGA-<br>TAGT       |
| Ceacam5 | Mouse |                                      | FW<br>REV | TAACCATTGAATT-<br>AGAGCCACCC<br>GGACCCAGCACAG-<br>TAACTTTAGT |
| Cldn1   | Mouse |                                      | FW<br>REV | TGCCCCAGTGGAAGAT-<br>TTACT<br>CTTTGCGAAACGCAG-<br>GACAT      |
| Cldn2   | Mouse |                                      | FW<br>REV | CAACTGGTGGGC-<br>TACATCCTA<br>CCCTTGGA AAA-<br>GCCAACCC      |
| Cldn3   | Mouse |                                      | FW<br>REV | ACCAACTGCGTACAA-<br>GACGAG<br>CGGGCACCAAC-<br>GGGTATAG       |
| Cldn4   | Mouse |                                      | FW<br>REV | ATGGCGTCTATGGGAC-<br>TACAG<br>GAGCGCACA ACTCAG-<br>GATG      |
| Cldn7   | Mouse |                                      | FW<br>REV | GGCCTGATAGCGAG-<br>CACTG<br>TGGCGACAAACATGGCTA<br>AGA        |

|        |       |           |                                                                                         |
|--------|-------|-----------|-----------------------------------------------------------------------------------------|
| Crb3   | Mouse | FW<br>REV | CACCG-<br>GACCCTTTCACAAATA<br>CCCACTGCTATAAGGAG-<br>GACT                                |
| Il10rb | Mouse | FW<br>REV | ACCTGCTTTCCCCAAAAC-<br>GAA<br>TGAGAGAAGTCGCAC-<br>TGAGTC                                |
| Il22ra | Mouse | FW<br>REV | ATGAAGACACTACTGAC-<br>CATCCT<br>CAGCCAC-<br>TTTCTCTCTCCGT                               |
| Jak1   | Mouse | FW<br>REV | CTCTCTGTCACAAC-<br>CTCTTCGC<br>TTGGTAAAGTAGAAC-<br>CTCATGCG                             |
| Jam2   | Mouse | FW<br>REV | GTGCCCAC-<br>TTCTGTTATGACTG<br>TCCCTAGCAAACCTT-<br>GTGCCA                               |
| Mapk1  | Mouse | FW<br>REV | GGTT-<br>GTTCCCAAATGCTGACT<br>CAACTTCAATCCTCTT-<br>GTGAGGG                              |
| Mapk9  | Mouse | FW<br>REV | AGTGATTGATCCAGACAA-<br>GCG<br>GCGGGGTCAT-<br>ACCAAACAGTA                                |
| Muc1   | Mouse | FW<br>REV | GGTTGCTTTGGC-<br>TATCGTCTATTT<br>AAA-<br>GATGTCCAGCTGCCCATA<br>ATGCCACCTCCTCAAA-<br>GAC |
| Muc2   | Mouse | FW<br>REV | GTAGTTTCCGTT-<br>GGAACAGTGAA                                                            |
| Muc13  | Mouse | FW<br>REV | GCCAGTCCTCCACCAC-<br>GGTA<br>CTGGGAC-<br>CTGTGCTTCCACCG                                 |
| aPkcζ  | Mouse | FW<br>REV | GCGTG-<br>GATGCCATGACAACAT<br>GGCTCTTGG-<br>GAAGGCATGACA                                |
| Rock2  | Mouse | FW<br>REV | TTGGTTCGTCATAAGGCAT<br>CAC<br>TGTTGGCAAAGGCCATAA-<br>TATCT                              |
| Rpl4   | Mouse | FW<br>REV | CCGTCCCCTCATA-<br>TCGGTGTA<br>GCATAGGGCTGTCTGTT-<br>GTTTT                               |
| Scrib  | Mouse | FW<br>REV | CCTGGGCATCAGTATCG-<br>CAG<br>GCCCTCGTCATCTCCTTTG<br>T                                   |
| Snai1  | Mouse | FW<br>REV | ATCTCTTCACATCCGAG-<br>TGG                                                               |

|      |       |           |                             |
|------|-------|-----------|-----------------------------|
|      |       |           | GAA-<br>GATGCACATCCGAAGC    |
|      |       |           | ATGGGAGCAGTACAC-<br>CGTGA   |
| Tjp2 | Mouse | FW<br>REV | TGAC-<br>CACCTGTCAATTTCTTG  |
|      |       |           | ATGGCATGGCTTACAC-<br>CACC   |
| Tlr4 | Mouse | FW<br>REV | GAGGCCAATTTT-<br>GTCTCCACA  |
|      |       |           | GCTGGCAAGACAAC-<br>GTGAAAAG |
| Zeb1 | Mouse | FW<br>REV | GCCTCAGGATAAATGAC-<br>GGC   |

**Table S2.** Gene selection based on their involvement in intestinal barrier function.

| Class              | Gene       | Description                    |
|--------------------|------------|--------------------------------|
| Tight junction     | CGN        | Cingulin                       |
| Tight junction     | CGNL1      | Cingulin Like 1                |
| Tight junction     | CLDN1      | Claudin 1                      |
| Tight junction     | CLDN2      | Claudin 2                      |
| Tight junction     | CLDN3      | Claudin 3                      |
| Tight junction     | CLDN4      | Claudin 4                      |
| Tight junction     | CLDN7      | Claudin 7                      |
| Tight junction     | CLDN12     | Claudin 12                     |
| Tight junction     | CLDN14     | Claudin 14                     |
| Tight junction     | CLDN15     | Claudin 15                     |
| Tight junction     | CLDN16     | Claudin 16                     |
| Tight junction     | CLDN18     | Claudin 18                     |
| Tight junction     | JAM2       | Junctional adhesion molecule 2 |
| Tight junction     | JAM3       | Junctional adhesion molecule 3 |
| Tight junction     | JAM4/IGSF5 | Junctional adhesion molecule 4 |
| Tight junction     | JAMA/F11R  | Junctional adhesion molecule A |
| Tight junction     | MARVELD1   | MARVEL Domain Containing 1     |
| Tight junction     | MARVELD2   | MARVEL Domain Containing 2     |
| Tight junction     | MARVELD3   | MARVEL Domain Containing 3     |
| Tight junction     | OCN        | Occludin                       |
| Tight junction     | TJP1       | Tight junction protein 1       |
| Tight junction     | TJP2       | Tight junction protein 2       |
| Tight junction     | TJP3       | Tight junction protein 3       |
| Adherens junctions | CDH1       | E-cadherin                     |
| Adherens junctions | CTNNA1     | Catenin A1                     |
| Adherens junctions | CTNNB1     | Catenin B1                     |
| Adherens junctions | CTNND1     | Catenin D1                     |
| Adherens junctions | VIM        | Vimentin                       |
| Desmosomes         | DSC1       | Desmocollin 1                  |
| Desmosomes         | DSC2       | Desmocollin 2                  |
| Desmosomes         | DSC3       | Desmocollin 3                  |
| Desmosomes         | DSG1       | Desmoglein 1                   |
| Desmosomes         | DSG2       | Desmoglein 2                   |
| Desmosomes         | DSG3       | Desmoglein 3                   |
| Desmosomes         | DSG4       | Desmoglein 4                   |
| Desmosomes         | DSP        | Desmoplakin                    |
| Desmosomes         | JUP        | Junction Plakoglobin           |
| Desmosomes         | PKP1       | Plakophilin 1                  |
| Desmosomes         | PKP2       | Plakophilin 2                  |

|                     |            |                                                         |
|---------------------|------------|---------------------------------------------------------|
| Desmosomes          | PKP3       | Plakophilin 3                                           |
| Desmosomes          | PKP4       | Plakophilin 4                                           |
| Desmosomes          | PPL        | Periplakin                                              |
| Hemidesmosomes      | DST        | Dystonin                                                |
| Hemidesmosomes      | ITGA6      | Integrin Subunit Alpha64                                |
| Hemidesmosomes      | ITGB4      | Integrin Subunit Beta 4                                 |
| Hemidesmosomes      | PLEC       | Plectin                                                 |
| Cytoskeleton        | MYL2       | Myosin Light Chain 2                                    |
| Cytoskeleton        | MYL5       | Myosin Light Chain 5                                    |
| Cytoskeleton        | MYL6       | Myosin Light Chain 6                                    |
| Cytoskeleton        | MYL6B      | Myosin Light Chain 6B                                   |
| Cytoskeleton        | MYL7       | Myosin Light Chain 7                                    |
| Cytoskeleton        | MYL9       | Myosin Light Chain 9                                    |
| Cytoskeleton        | MYL12A     | Myosin Light Chain 12A                                  |
| Cytoskeleton        | MYL12B     | Myosin Light Chain 12B                                  |
| Cytoskeleton        | MYLK       | Myosin Light Chain Kinase                               |
| Cytoskeleton        | MYO9B      | Myosin IXB                                              |
| Mucus layer         | MUC1       | Mucin 1                                                 |
| Mucus layer         | MUC2       | Mucin 2                                                 |
| Mucus layer         | MUC3A      | Mucin 3A                                                |
| Mucus layer         | MUC12      | Mucin 12                                                |
| Mucus layer         | MUC13      | Mucin 13                                                |
| Mucus layer         | MUC17      | Mucin 17                                                |
| Mucus layer         | MUC20      | Mucin 20                                                |
| Mucus layer         | TFF1       | Trefoil Factor 1                                        |
| Mucus layer         | TFF2       | Trefoil Factor 2                                        |
| Mucus layer         | TFF3       | Trefoil Factor 3                                        |
| Epithelial immunity | ACE2       | Angiotensin Converting Enzyme 2                         |
| Epithelial immunity | CEACAM1    | CEA Cell Adhesion Molecule 1                            |
| Epithelial immunity | CEACAM18   | CEA Cell Adhesion Molecule 18                           |
| Epithelial immunity | CEACAM19   | CEA Cell Adhesion Molecule 19                           |
| Epithelial immunity | CEACAM5    | CEA Cell Adhesion Molecule 5                            |
| Epithelial immunity | CEACAM6    | CEA Cell Adhesion Molecule 6                            |
| Epithelial immunity | CEACAM8    | CEA Cell Adhesion Molecule 8                            |
| Epithelial immunity | EPCAM      | Epithelial Cell Adhesion Molecule                       |
| Epithelial immunity | TLR3       | Toll Like Receptor 3                                    |
| Epithelial immunity | TLR4       | Toll Like Receptor 4                                    |
| Epithelial immunity | TLR5       | Toll Like Receptor 5                                    |
| Epithelial immunity | TLR6       | Toll Like Receptor 6                                    |
| Cell polarity       | CRB3       | Crumbs Cell Polarity Complex Component 3                |
| Cell polarity       | DLG1       | Discs Large MAGUK Scaffold Protein 1                    |
| Cell polarity       | DLG2       | Discs Large MAGUK Scaffold Protein 2                    |
| Cell polarity       | DLG3       | Discs Large MAGUK Scaffold Protein 3                    |
| Cell polarity       | DLG4       | Discs Large MAGUK Scaffold Protein 4                    |
| Cell polarity       | DLG5       | Discs Large MAGUK Scaffold Protein 5                    |
| Cell polarity       | LLGL2      | LLGL Scribble Cell Polarity Complex Component 2         |
| Cell polarity       | MPP5/PALS1 | Protein Associated With LIN7 1, MAGUK P55 Family Member |
| Cell polarity       | PARD3A     | Par-3 Family Cell Polarity Regulator Alpha              |
| Cell polarity       | PARD3B     | Par-3 Family Cell Polarity Regulator Beta               |
| Cell polarity       | PARD6A     | Par-6 Family Cell Polarity Regulator Alpha              |
| Cell polarity       | PARD6B     | Par-6 Family Cell Polarity Regulator Beta               |
| Cell polarity       | PATJ       | PATJ Crumbs Cell Polarity Complex Component             |
| Cell polarity       | PRKCA      | Protein Kinase C Alpha                                  |
| Cell polarity       | PRKCD      | Protein Kinase C Delta                                  |
| Cell polarity       | PRKCE      | Protein Kinase C Epsilon                                |
| Cell polarity       | PRKCI      | Protein Kinase C Iota                                   |
| Cell polarity       | PRKCZ      | Protein Kinase C Zeta                                   |



|                     |            |                                                                      |
|---------------------|------------|----------------------------------------------------------------------|
| Cell polarity       | PRKD3      | Protein Kinase D3                                                    |
| Cell polarity       | PRKDC      | Protein Kinase D Gamma                                               |
| Cell polarity       | SCRIB      | Scribble Planar Cell Polarity Protein                                |
| Regulating proteins | AFDN       | Afadin, Adherens Junction Formation Factor                           |
| Regulating proteins | AKT1       | AKT Serine/Threonine Kinase 1                                        |
| Regulating proteins | AMOT       | Angiomotin                                                           |
| Regulating proteins | AMOTL1     | Angiomotin Like 1                                                    |
| Regulating proteins | AMOTL2     | Angiomotin Like 2                                                    |
| Regulating proteins | ARHGAP17   | Rho GTPase Activating Protein 17                                     |
| Regulating proteins | ARHGAP21   | Rho GTPase Activating Protein 21                                     |
| Regulating proteins | ARNT       | Aryl Hydrocarbon Receptor Nuclear Translocator                       |
| Regulating proteins | CBL        | Cbl Proto-Oncogene                                                   |
| Regulating proteins | CDC42      | Cell Division Cycle 42                                               |
| Regulating proteins | CDX1       | Caudal Type Homeobox 1                                               |
| Regulating proteins | CDX2       | Caudal Type Homeobox 2                                               |
| Regulating proteins | CEBPA      | CCAAT Enhancer Binding Protein Alpha                                 |
| Regulating proteins | CEBPB      | CCAAT Enhancer Binding Protein Beta                                  |
| Regulating proteins | CXADR      | CXADR Ig-Like Cell Adhesion Molecule                                 |
| Regulating proteins | EGFR       | Epidermal Growth Factor Receptor                                     |
| Regulating proteins | EHF        | ETS Homologous Factor                                                |
| Regulating proteins | ERBB2      | Erb-B2 Receptor Tyrosine Kinase 2                                    |
| Regulating proteins | ERBB3      | Erb-B2 Receptor Tyrosine Kinase 3                                    |
| Regulating proteins | ERK1/MAPK3 | Mitogen-Activated Protein Kinase 3                                   |
| Regulating proteins | ERK2/MAPK1 | Mitogen-Activated Protein Kinase 1                                   |
| Regulating proteins | EZH2       | Enhancer Of Zeste 2 Polycomb Repressive Complex 2 Subunit            |
| Regulating proteins | F2RL2      | Coagulation Factor II Thrombin Receptor Like 2                       |
| Regulating proteins | FAK/PTK2   | Protein Tyrosine Kinase 2                                            |
| Regulating proteins | FOXO4      | Forkhead Box O4                                                      |
| Regulating proteins | GNA12      | G Protein Subunit Alpha 12                                           |
| Regulating proteins | HDAC2      | Histone Deacetylase 2                                                |
| Regulating proteins | HIF1A      | Hypoxia Inducible Factor 1 Subunit Alpha                             |
| Regulating proteins | HNF1A      | HNF1 Homeobox A                                                      |
| Regulating proteins | HNF4A      | Hepatocyte Nuclear Factor 4 Alpha                                    |
| Regulating proteins | JAK1       | Janus Kinase 1                                                       |
| Regulating proteins | JAK2       | Janus Kinase 2                                                       |
| Regulating proteins | JAK3       | Janus Kinase 3                                                       |
| Regulating proteins | JNK1/MAPK8 | Mitogen-Activated Protein Kinase 8                                   |
| Regulating proteins | JNK2/MAPK9 | Mitogen-Activated Protein Kinase 9                                   |
| Regulating proteins | MAGI1      | Membrane Associated Guanylate Kinase, WW And PDZ Domain Containing 1 |
| Regulating proteins | MAGI2      | Membrane Associated Guanylate Kinase, WW And PDZ Domain Containing 2 |
| Regulating proteins | MAGI3      | Membrane Associated Guanylate Kinase, WW And PDZ Domain Containing 3 |
| Regulating proteins | MAPK13     | Mitogen-Activated Protein Kinase 13                                  |
| Regulating proteins | MEP1A      | Meprin A Subunit Alpha                                               |
| Regulating proteins | MYC        | MYC Proto-Oncogene, BHLH Transcription Factor                        |
| Regulating proteins | NFKB1      | Nuclear Factor Kappa B1                                              |
| Regulating proteins | NFKBIA     | Nuclear Factor Kappa B1 Inhibitor Alpha                              |
| Regulating proteins | PTGER4     | Prostaglandin E Receptor 4                                           |
| Regulating proteins | PTPN2      | Protein Tyrosine Phosphatase Non-Receptor Type 2                     |
| Regulating proteins | RAC1       | Rac Family Small GTPase 1                                            |
| Regulating proteins | RAC2       | Rac Family Small GTPase 2                                            |
| Regulating proteins | RAC3       | Rac Family Small GTPase 3                                            |
| Regulating proteins | RETNLB     | Resistin Like Beta                                                   |
| Regulating proteins | RHOA       | Ras Homolog Family Member A                                          |

|                     |               |                                                                                                   |
|---------------------|---------------|---------------------------------------------------------------------------------------------------|
| Regulating proteins | ROCK1         | Rho Associated Coiled-Coil Containing Protein Kinase 1                                            |
| Regulating proteins | ROCK2         | Rho Associated Coiled-Coil Containing Protein Kinase 2                                            |
| Regulating proteins | SH3KBP1/CIN85 | SH3 Domain Containing Kinase Binding Protein 1                                                    |
| Regulating proteins | SMARCA4       | SWI/SNF Related, Matrix Associated, Actin Dependent Regulator Of Chromatin, Subfamily A, Member 4 |
| Regulating proteins | SMURF1        | SMAD Specific E3 Ubiquitin Protein Ligase 1                                                       |
| Regulating proteins | SMURF2        | SMAD Specific E3 Ubiquitin Protein Ligase 2                                                       |
| Regulating proteins | SNAI1         | Snail Family Transcriptional Repressor 1                                                          |
| Regulating proteins | SPATA13       | Spermatogenesis Associated 13                                                                     |
| Regulating proteins | SPINT2        | Serine Peptidase Inhibitor, Kunitz Type 2                                                         |
| Regulating proteins | STAT3         | Signal Transducer And Activator Of Transcription 3                                                |
| Regulating proteins | STAT5A        | Signal Transducer And Activator Of Transcription 5 Alpha                                          |
| Regulating proteins | STAT5B        | Signal Transducer And Activator Of Transcription 5 Beta                                           |
| Regulating proteins | SYMPK         | Symplekin Scaffold Protein                                                                        |
| Regulating proteins | TCF4          | Transcription Factor 4                                                                            |
| Regulating proteins | VDR           | Vitamin D Receptor                                                                                |
| Regulating proteins | WAS           | WASP Actin Nucleation Promoting Factor                                                            |
| Regulating proteins | WASF1         | WASP Family Member 1                                                                              |
| Regulating proteins | WNT10A        | Wnt Family Member 10A                                                                             |
| Regulating proteins | WNT10B        | Wnt Family Member 10B                                                                             |
| Regulating proteins | WNT11         | Wnt Family Member 11                                                                              |
| Regulating proteins | WNT2B         | Wnt Family Member 2B                                                                              |
| Regulating proteins | WNT4          | Wnt Family Member 4                                                                               |
| Regulating proteins | WNT9A         | Wnt Family Member 9A                                                                              |
| Regulating proteins | ZEB1          | Zinc Finger E-Box Binding Homeobox 1                                                              |

Adapted from Vancamelbeke et al. (2017) [1].

## References

1. Vancamelbeke, M.; Vanuytsel, T.; Farré, R.; Verstockt, S.; Ferrante, M.; Van Assche, G.; Rutgeerts, P.; Schuit, F.; Vermeire, S.; Arijis, I.; et al. Genetic and Transcriptomic Bases of Intestinal Epithelial Barrier Dysfunction in Inflammatory Bowel Disease. *Inflamm. Bowel. Dis.* **2017**, *23*, 1718–1729.
